# Supplementary material for: A dual-site controlled pH probe revealing the pH of sperm cytoplasm and screening for healthy spermatozoa
Source: Royal Society of Chemistry journal article supplement (doi:10.1039/d1tb00108f), 2021-01-01
Supplement: d1tb00108f1.pdf [file d1tb00108f1.pdf]

## Supporting Information

### A dual-site controlled pH probe revealing the pH in sperm cytoplasm and screening for high quality sperm

Xiaoliang Li <sup>a, f</sup>, Sixian Wu <sup>a, f</sup>, Kangkang Yu <sup>b</sup>, Jianwen Hou <sup>a</sup>, Chuan Jiang <sup>a</sup>, Kun Li <sup>c</sup>, Zhiwen Chu <sup>d</sup>,  
Xiaohui Jiang <sup>e</sup>, Xiaoqi Yu <sup>c,\*</sup> and Wenming Xu <sup>a,\*</sup>

- <sup>a</sup> Joint Laboratory of Reproductive Medicine, SCU-CUHK, Key Laboratory of Obstetric, Gynaecologic and Paediatric Diseases and Birth Defects of Ministry of Education, West China Second University Hospital, Sichuan University, Chengdu, 610041, China.
- <sup>b</sup> Key Laboratory of Bio-resources and Eco-environment (Ministry of Education), College of Life Sciences, Sichuan University, Chengdu, 610064, China.
- <sup>c</sup> Key Laboratory of Green Chemistry and Technology (Ministry of Education), College of Chemistry, Sichuan University, Chengdu, 610064, China.
- <sup>d</sup> West China School of Pharmacy, Sichuan University, Chengdu, 610064, China.
- <sup>e</sup> Human Sperm Bank, West China Second University Hospital, Sichuan University, Chengdu, 610041, China.
- <sup>f</sup> Equal contribution, the authors should both be regarded as first authors.

#### Corresponding Authors:

\*E-mails: xqyu@scu.edu.cn and xuwenming@scu.edu.cn;

|                               |   |
|-------------------------------|---|
| Contents .....                | 1 |
| Experimental Procedures ..... | 1 |
| Supplementary Figures .....   | 4 |
| Supplementary Tables .....    | 8 |
| Author Contributions .....    | 8 |
| References.....               | 9 |

#### Contents

#### Experimental Procedures

##### Subjects and controls

This study was approved by the Ethics Committees at West China Second University Hospital of Sichuan University. Informed consent was obtained from every participant. The inclusion and

exclusion criteria used in this study were selected according to previously published reports and the guidelines of the World Health Organization (WHO)<sup>1</sup>. Control samples of semen were collected from healthy donors whose fertility had been previously confirmed and who had a sperm count of >40 million/mL, a total motility >80%, and a progressive motility >60%.

Asthenozoospermia samples of semen were collected from the male infertility clinic from patients with A+B <32% according to CASA analysis.

#### **pH probe transfection and fluorescence detection**

Briefly, 1–2 mL of semen was washed three times with 2–3 mL of PBS. The semen samples were then placed in 15 mL centrifuge tubes and centrifuged at  $520 \times g$  for 10 mins. Then, PBS was used to resuspend the pellet to obtain an appropriate concentration of sperm. A previously developed gold nanometer pH probe, AuNP, was added to sperm and incubated for 10 min at 25°C. The sample was then washed with PBS to remove the pH probe. A NEST 3.5-mm glass-bottom dish coated with poly-lysine was prepared in advance. Then, 3  $\mu$ L of the prepared co-stained sperm was placed on the glass-bottom dishes to obtain images using laser confocal microscope (Olympus Micro).

#### **Standard curve of AuNP pH probe**

To further explore the applicability of AuNP probe in sperm, sperm were treated with each “nano-submarine” and the H<sup>+</sup>/K<sup>+</sup> ionophore nigericin (which was applied to homogenize the endocellular pH with that of the surrounding medium). All the sperm images were collected at 500–550 nm for the fluorescein unit (the green channel,  $\lambda_{ex}$  488 nm), 570–650 nm for the rhodamine unit (the red channel,  $\lambda_{ex}$  552 nm). and then a standard intracellular pH calibration curve for each “nano-submarine” was established.

#### **Immunofluorescence**

The sperm samples were fixed onto slides using 4% paraformaldehyde for 10 min, followed by washing with PBS. The slides were permeabilised with 0.3% Triton X-100 and blocked with 5% BSA in PBS. The slides were then sequentially incubated with the corresponding primary antibodies (anti-QRICH2 (1:50) (HPA052219; Sigma-Aldrich) anti- $\alpha$ -tubulin (1:2000) (T7451; Sigma-Aldrich), and anti-Tyr (1:500) (Thermo Fisher)) overnight at 4°C. On the following day, the slides were washed with PBS and incubated with Alexa Fluor 488 (1:500) (A21206; Thermo Fisher) or Alexa Fluor 594 (1:500) (A11005; Thermo Fisher)-labelled secondary antibodies for 1 h at room temperature, followed by counterstaining with 4,6-diamidino-2-phenylindole (DAPI) (Sigma-Aldrich) to label the nuclei. Images were obtained using a laser scanning confocal microscope (Olympus). Some of the sperm samples (asthenozoospermia and control) were treated with NNC 55-0396 or progesterone at different conditions prior to fixation.

#### **Image-based flow cytometric data acquisition and analysis**

Using a Flow Sight flow cytometer (FS) fitted with a  $\times 20$  microscope objective (numerical aperture of 0.9) with an imaging rate up to 2000 events per s. The sheath fluid was PBS (without Ca<sup>2+</sup> or Mg<sup>2+</sup>). The flow-core diameter and speed was 10  $\mu$ m and 66mm per s, respectively. Raw image data were acquired using INSPIRE® software. To produce the highest resolution, the camera setting was at 1.0  $\mu$ m per pixel of the charged coupled device. In INSPIRE® FS data acquisition software, two bright-field channels were collected (channels 1 and 9), one FZ3 image (channel 2), one PI image (channel 5), one side scatter (SSC; channel 6), one H33342 (channel 7), and one PNA-AF647 image (channel 11), with a minimum of 10,000 spermatozoa collected. The following lasers and power settings were used: 405 nm (to excite H33342): 10 mW; 488 nm (to

excite FZ3): 60 mW; 561 nm (to excite PI): 40 mW, 642 nm (to excite PNA-AF647): 25 mW; and 785 nM SSC laser: 10 mW.

### **Sperm viability**

After pH probe incubation, the sperm were mixed with eosin staining solution (Puhualife, China) equal volume and stained for 5 minutes. Then the sperm was smeared to slides and observed under the microscope. were counted, and the percentage of unstained sperm was calculated in two hundrads sperm.

### **Statistical analysis**

All data are expressed as the mean  $\pm$  standard error of the mean (SEM). All statistical analysis was performed using GraphPad Prism software (version 8.00, CA, USA). For the comparison between two groups, a two-tailed Student's t-test was used. For the comparison of more than two groups, statistical comparisons were performed using one-way analysis of variance (ANOVA). Significant differences between or among groups are indicated by \* $p < 0.05$ , \*\* $p < 0.01$ , and \*\*\* $p < 0.001$ , respectively.

## Supplementary Figures

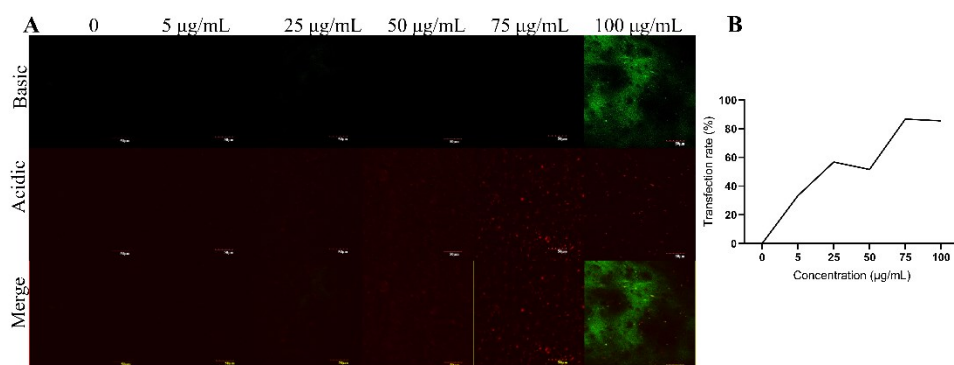

**Fig. S1** The fluorescence images(A) and statistic(B) of different concentrations of pH probes in sperm. Scale bars: 50 µm

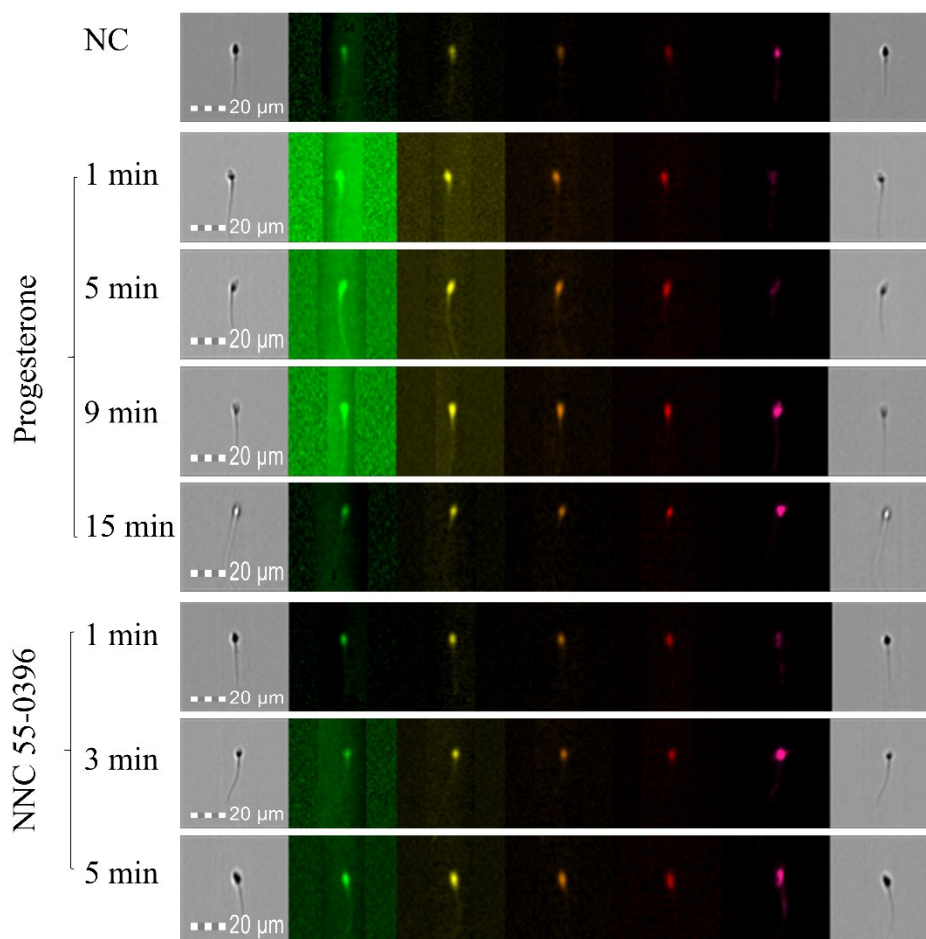

**Fig. S2** Imaging results of single sperm captured by IBFC under different processing conditions after adding AuNPs. Scale bars: 20 µm

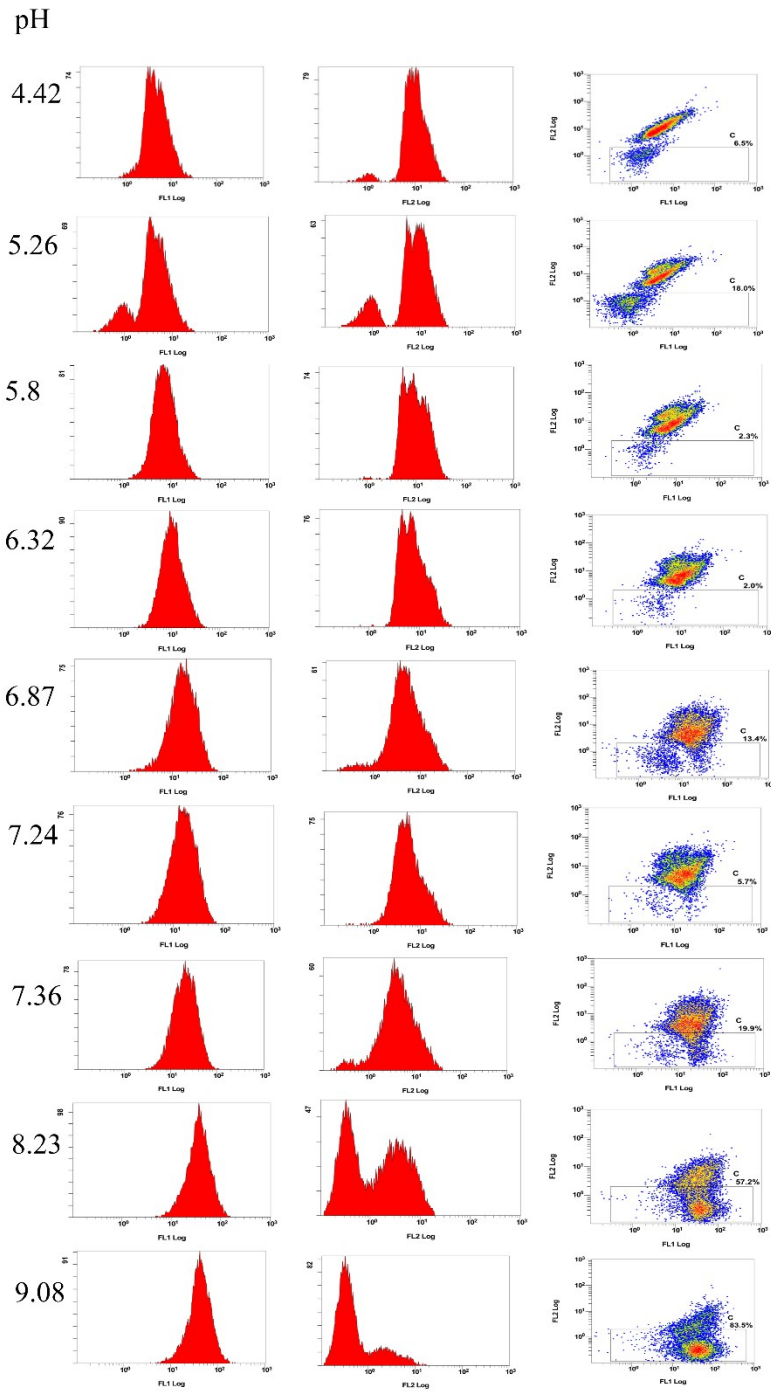

**Figure S3** Flow cytometry images of sperm at different pH with AuNP (75 µg/mL) after treatment with nigericin.

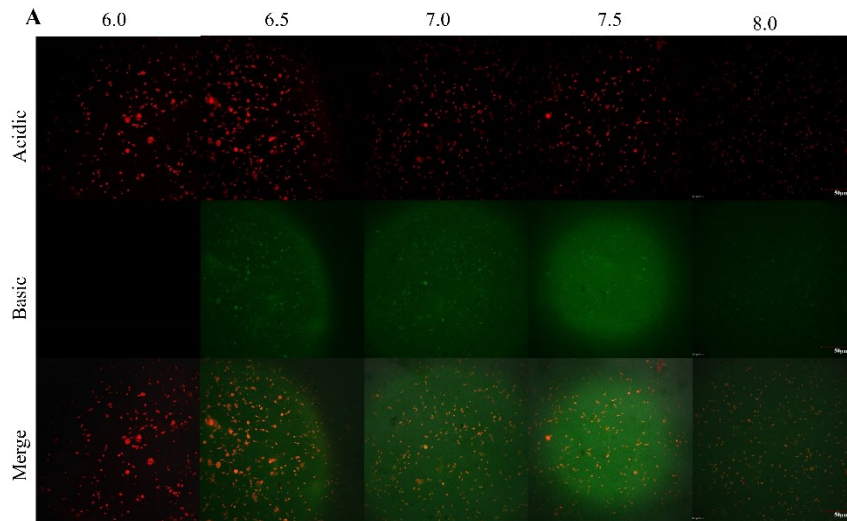

**Fig. S4** The fluorescence images of AuNPs(75  $\mu\text{g/mL}$ ) in sperm at pH from 6.0 to 8.0. Scale bars: 50  $\mu\text{m}$

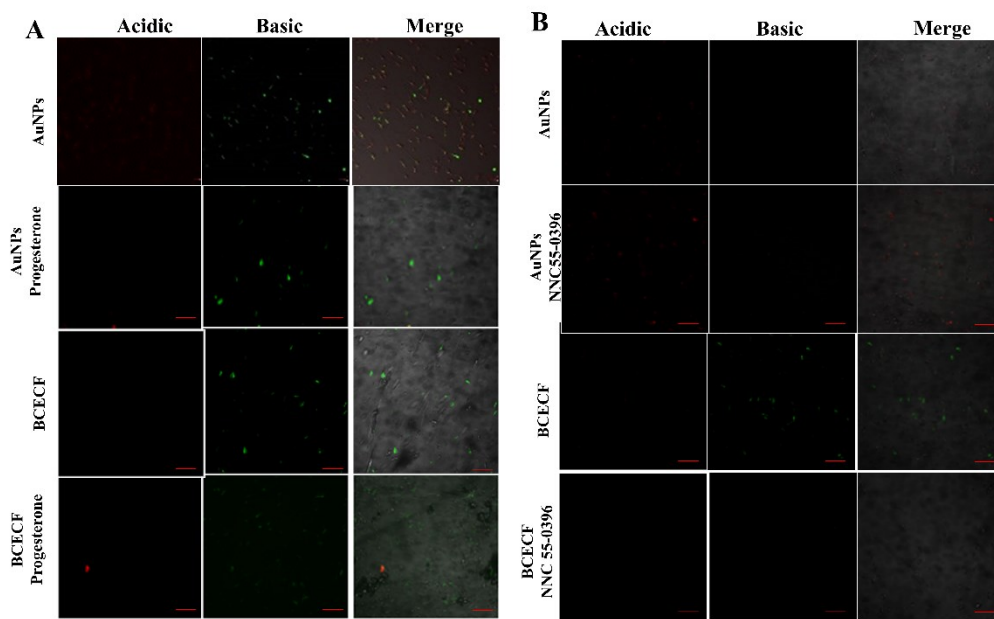

**Figure S5** Treated sperm with progesterone (A) and NNC 55-0396 (B), compare the staining characteristics of BCECF and AuNPs. Scale bars: 50  $\mu\text{m}$

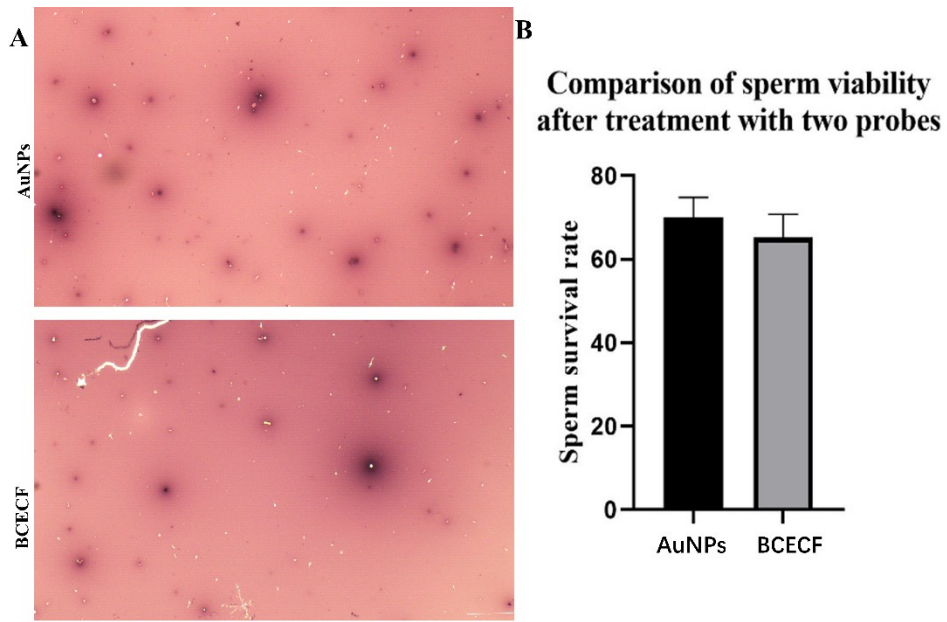

**Fig. S6** Comparison of changes in sperm viability rate after the treatment of BCECF and AuNP

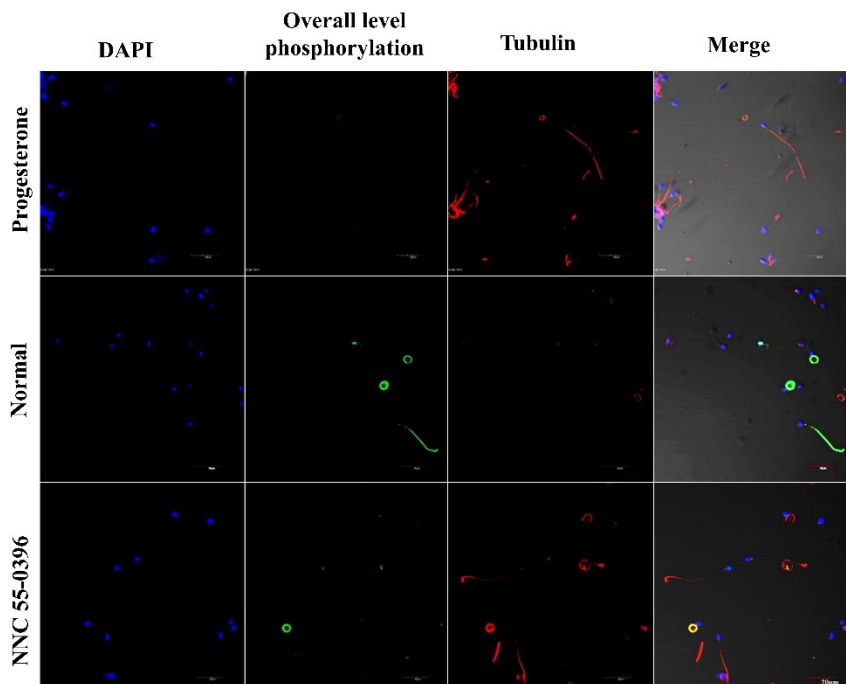

**Fig. S7** The overall level phosphorylation of sperm at different conditions. Scale bars: 50  $\mu$ m

## Supplementary Tables

**Table S1** The comparison of TG AuNPs, AuNCs and AuNPs .

|          | pH resolution      | responsive pH range | reusability |
|----------|--------------------|---------------------|-------------|
| TG AuNPs | <10%               | 5.0-11.0            | 6.0-10.0    |
| AuNCs    | $\Delta$ pH < 0.35 | 5.5-7.5             | 6.05-6.40   |
| AuNPs    |                    | 4.5-8.0             | 6.0-8.0     |

**Table S2** Comparison of AuNPs applied between hela cell and sperm.

|                                      | Hela cell     | Sperm                      |
|--------------------------------------|---------------|----------------------------|
| The time of incubation               | 30 min        | 30 min                     |
| The concentration of AuNPs           | 50 $\mu$ g/mL | 75 $\mu$ g/mL              |
| The temperature of incubation        | 37 °C         | 20-25 °C                   |
| The formula of linear transformation | Linear fit    | Logarithmic transformation |
| The pH range of linearity            | 6.0-8.0       | 5.2-8.2                    |

**Table S3** The statistics of Flow cytometry of sperm at different pH with AuNP (75  $\mu$ g/mL) after treatment with nigericin.

| pH   | X is Green | Y is Red | G/R      | Number | Total% | Gate% | All-Number |
|------|------------|----------|----------|--------|--------|-------|------------|
| 4.42 | 1.88       | 1.02     | 1.843137 | 757    | 5.05   | 6.53  | 11598      |
| 5.26 | 1.03       | 0.876    | 1.175799 | 2206   | 14.71  | 18.04 | 12230      |
| 5.8  | 2.32       | 0.99     | 2.343434 | 292    | 1.95   | 2.34  | 12458      |
| 6.32 | 4.1        | 0.838    | 4.892601 | 244    | 1.63   | 1.95  | 12507      |
| 6.87 | 14.7       | 1.06     | 13.86792 | 1687   | 11.25  | 13.41 | 12583      |
| 7.24 | 16         | 1.27     | 12.59843 | 729    | 4.86   | 5.69  | 12820      |
| 7.36 | 23.6       | 1.08     | 21.85185 | 2491   | 16.61  | 19.9  | 12519      |
| 8.23 | 40.4       | 0.627    | 64.43381 | 7170   | 47.8   | 57.2  | 12536      |
| 9.08 | 45.2       | 0.484    | 93.38843 | 10045  | 66.97  | 83.47 | 12034      |

**Table S4** Comparison of AuNPs and BCECF-AM applied in sperm.

|                                 | AuNPs                                    | BCECF-AM        |
|---------------------------------|------------------------------------------|-----------------|
| The viability of sperm          | 70%                                      | 65%             |
| The concentration of incubation | 75 $\mu$ g/mL                            | 2150 $\mu$ g/mL |
| $\Delta$ ex                     | 450nm (Fluorescein)<br>550nm (Rhodamine) | 488nm           |
| $\Delta$ em                     | 510nm (Fluorescein)<br>580nm (Rhodamine) | 535nm           |



|                           |           |         |
|---------------------------|-----------|---------|
| The color of fluorescence | Red/Green | Green   |
| The pH range              | 5.2-8.2   | 6.2-9.5 |

## References

1. Y. Shen, F. Zhang, F. Li, X. Jiang, Y. Yang, X. Li, W. Li, X. Wang, J. Cheng and M. J. N. c. Liu, 2019, **10**, 1-15.
